# Supplementary material for: Biochemical and Structural Characteristics, Gene Regulation, Physiological, Pathological and Clinical Features of Lipocalin-Type Prostaglandin D2 Synthase as a Multifunctional Lipocalin
Source: PubMed Central journal article supplement (PMC8569824; doi:10.3389/fphys.2021.718002), 2021-10-22
Supplement: Table_1.pdf [file Table_1.pdf]

**Table 1. History in the study of PGD<sub>2</sub> and L-PGDS**

| Year | Event                                                                                          | Ref                                |
|------|------------------------------------------------------------------------------------------------|------------------------------------|
| 1961 | Discovery of beta-trace as a major human CSF protein                                           | Clausen 1961                       |
| 1979 | Purification of H-PGDS from rat spleen                                                         | Christ-Hazelhof and Nugteren. 1979 |
| 1982 | Discovery of sleep induction by PGD <sub>2</sub> administration to rat brain                   | Ueno et al., 1982                  |
| 1985 | Purification of L-PGDS from rat brain                                                          | Urade et al., 1985                 |
| 1987 | Comparison between L-PGDS and H-PGDS as an example of functional convergence                   | Urade et al., 1987                 |
| 1989 | cDNA cloning of rat L-PGDS/Identification of N-terminal signal sequence & N-glycosylation site | Urade et al., 1989                 |
| 1991 | cDNA cloning of human L-PGDS/Characterization as a member of lipocalin                         | Nagata et al., 1991                |
| 1992 | Chromosomal gene cloning of rat L-PGDS                                                         | Igarashi et al., 1992              |
| 1993 | Dominant localization of L-PGDS in leptomeninges (arachnoid membrane) of the rat brain         | Urade et al., 1993                 |
|      | Identification of beta-trace as L-PGDS                                                         | Hoffmann et al., 1993              |
| 1994 | cDNA cloning of DP receptor                                                                    | Hirata et al., 1994                |
| 1995 | Identification of Cys65 as an active site of L-PGDS                                            | Urade et al., 1995                 |
| 1997 | Retinoid binding properties of L-PGDS                                                          | Tanaka et al., 1997                |
|      | cDNA cloning and crystallographic structure of rat H-PGDS                                      | Kanaoka et al., 1997               |
|      | High expression of human L-PGDS in the heart and secretion of L-PGDS to coronary circulation   | Eguchi et al., 1997                |
|      | Generation of FP KO mice                                                                       | Sugimoto et al., 1997              |
| 1998 | Purification of L-PGDS from human seminal plasma/distribution of L-PGDS in human male organ    | Tokugawa et al., 1998              |
| 1999 | Generation of L-PGDS KO mice                                                                   | Eguchi et al., 1999                |
|      | Identification of CRTH2 receptor as a PGD <sub>2</sub> receptor                                | Nagata et al., 1999                |
| 2000 | Generation of human L-PGDS-overexpressing TG mice                                              | Fujitani et al., 2000              |
|      | Generation of DP KO mice                                                                       | Matsuoka et al., 2000              |
| 2001 | cDNA cloning of CRTH2 receptor                                                                 | Hirai et al., 2001                 |
| 2006 | Identification of HQL79 as a competitive inhibitor of H-PGDS                                   | Aritake et al., 2006               |
|      | Generation of CRTH2 KO mice                                                                    | Satoh et al., 2006                 |
| 2007 | Determination of NMR structure of mouse L-PGDS (Cys65Ala mutant)                               | Shimamoto et al., 2007             |
|      | Identification of L-PGDS as a major amyloid beta chaperon in CSF                               | Kanekiyo et al., 2007              |

|      |                                                                                          |                        |
|------|------------------------------------------------------------------------------------------|------------------------|
|      | Generation of H-PGDS KO mice                                                             | Park et al., 2007      |
| 2009 | Determination of X-ray crystallographic structure of mouse L-PGDS (Cys65Ala mutant)      | Kumasaka et al., 2009  |
|      | Identification of AT56 as an competitive inhibitor of L-PGDS                             | Irikura et al., 2009   |
| 2010 | Generation of human H-PGDS-overexpressing TG mice                                        | Fujitani et al., 2010  |
|      | Determination of X-ray crystallographic structure of human L-PGDS                        | Zhou et al., 2010      |
| 2012 | Generation of L-PGDS flox mice                                                           | Kaneko et al., 2012    |
| 2014 | Determination of X-ray crystallographic structure of apo- and holo-forms of human L-PGDS | Perduca et al., 2014   |
| 2016 | Generation of DP flox mice                                                               | Kong et al., 2016      |
| 2017 | Generation of H-PGDS flox mice                                                           | Nakamura et al., 2017  |
| 2018 | Generation of FP flox mice                                                               | Wang et al., 2018      |
| 2021 | Substrate-induced product release mechanism of L-PGDS                                    | Shimamoto et al., 2021 |
