# Supplementary material for: Biochemical and Structural Characteristics, Gene Regulation, Physiological, Pathological and Clinical Features of Lipocalin-Type Prostaglandin D2 Synthase as a Multifunctional Lipocalin
Source: PubMed Central journal article supplement (PMC8569824; doi:10.3389/fphys.2021.718002), 2021-10-22
Supplement: Table_2.pdf [file Table_2.pdf]

**Table 2. Catalytic and molecular properties of human L-PGDS and H-PGDS**

|                                   | L-PGDS/ $\beta$ -trace                                                                                                                                                                                 | H-PGDS                                                                                      |
|-----------------------------------|--------------------------------------------------------------------------------------------------------------------------------------------------------------------------------------------------------|---------------------------------------------------------------------------------------------|
| Molecular weight of monomer       | ~26 000                                                                                                                                                                                                | ~23 000                                                                                     |
| Tertiary structure                | Monomer                                                                                                                                                                                                | Homodimer                                                                                   |
| Cofactor                          | Sulfhydryl compounds, such as dithiothreitol, $\beta$ -mercaptoethanol, glutathione, cystein, cysteamine                                                                                               | Glutathione                                                                                 |
| Amino acid residues               | 190<br>(168 without signal sequence)                                                                                                                                                                   | 199                                                                                         |
| Activated thiol as an active site | Cys65                                                                                                                                                                                                  | Glutathione bound to the enzyme                                                             |
| Inhibitor                         | SeCl <sub>4</sub> , AT56                                                                                                                                                                               | HQL79, TFC007, TAS204                                                                       |
| Activator                         |                                                                                                                                                                                                        | Mg <sup>2+</sup>                                                                            |
| Gene name                         | ptgds                                                                                                                                                                                                  | hpgds                                                                                       |
| Chromosomal localization          | 9q34.3 (Chr19: 136.98 Mb)                                                                                                                                                                              | 4q22.3                                                                                      |
| Post-translational modification   | N-glycosylation (Asn29 and Asn56), a core-1-HexHexNAc-O-glycan at Ser7, acetylation at Lys16 and Lys138, sulfonation at Ser41 and Thr142, and dioxidation at Cys43 and Cys145 without signal sequence. | unknown                                                                                     |
| Subcellular localization          | ER membrane, extracellular space ( $\beta$ -trace: CSF, inter-photoreceptor matrix, seminal plasma, plasma)                                                                                            | Cytosol (resting state), nuclear and ER membranes (active state after membrane trafficking) |
