# Supplementary material for: Biochemical and Structural Characteristics, Gene Regulation, Physiological, Pathological and Clinical Features of Lipocalin-Type Prostaglandin D2 Synthase as a Multifunctional Lipocalin
Source: PubMed Central journal article supplement (PMC8569824; doi:10.3389/fphys.2021.718002), 2021-10-22
Supplement: Table_3.pdf [file Table_3.pdf]

**Table 3. Human genes, coupled G-proteins, ligands and physiological function of 3 distinct types of PGD<sub>2</sub> receptors.**

| PGD <sub>2</sub> receptors | DP                                                                                                     | CRTH2                                                                                                                                | FP                                      |
|----------------------------|--------------------------------------------------------------------------------------------------------|--------------------------------------------------------------------------------------------------------------------------------------|-----------------------------------------|
| Other names                | DP1                                                                                                    | DP2, GPR44, CD294                                                                                                                    |                                         |
| Gene                       | ptgdr                                                                                                  | ptgdr2                                                                                                                               | ptgfr                                   |
| Human chromosome           | Chr 14:52.27-52.28 Mb                                                                                  | Chr 11:60.85-60.86 Mb                                                                                                                | Chr 1:78.3-78.54 Mb                     |
| Coupled G protein          | Gs                                                                                                     | Gi                                                                                                                                   | Gq                                      |
| Agonists                   | BW245C                                                                                                 | 13,14-dihydro-15-keto PGD <sub>2</sub>                                                                                               | PGF <sub>2α</sub> , AL8810              |
| Antagonists                | BWA868C                                                                                                | Cay10471                                                                                                                             | Fluprostenol                            |
|                            | ONO4127Na                                                                                              | OC000459                                                                                                                             |                                         |
| Physiological function     | Regulation of sleep, pain, food intake, mast cell maturation Sertoli cell differentiation, and others. | Myelination of PNS, chronic stress-induced depression, adipocyte differentiation, inhibition of hair follicle neogenesis and others. | Dexamethasone-induced cardioprotection. |
