# Supplementary material for: Biochemical and Structural Characteristics, Gene Regulation, Physiological, Pathological and Clinical Features of Lipocalin-Type Prostaglandin D2 Synthase as a Multifunctional Lipocalin
Source: PubMed Central journal article supplement (PMC8569824; doi:10.3389/fphys.2021.718002), 2021-10-22
Supplement: Table_4.pdf [file Table_4.pdf]

**Table 4. Non-substrate ligands of L-PGDS/ $\beta$ -trace**

| Ligand                                                                                                                                                                                                                                                                           | Affinities Kd                                                                         | Binding ratio     | Methods*                                                              | Ref                                                                                                                       |
|----------------------------------------------------------------------------------------------------------------------------------------------------------------------------------------------------------------------------------------------------------------------------------|---------------------------------------------------------------------------------------|-------------------|-----------------------------------------------------------------------|---------------------------------------------------------------------------------------------------------------------------|
| <b>Retinoids</b><br><i>All-trans- or 9-cis-retinoic acid</i><br><i>All-trans- or 13-cis-retinal</i><br><i>All-trans-retinoic acid</i><br><i>All-trans-retinoic acid,</i>                                                                                                         | 70-80 nM                                                                              | 1:1               | TFQ, CD<br><br>NMR<br>SAXS                                            | Tanaka et al., 1997<br><br>Shimamoto et al., 2007<br>Inoue et al., 2009                                                   |
| <b>Thyroids</b><br>L-thyroxine<br>3-3',5'-Triiodo-L-thyronine<br>3-3',5'-Triiodo-L-thyronine                                                                                                                                                                                     | 660 nM<br>820 nM<br>2.6 $\mu$ M                                                       |                   | TFQ, SPR                                                              | Beuckmann et al., 1999                                                                                                    |
| <b>Heme and its degradation products</b><br>Biliverdin<br>Bilirubin<br>Bilirubin, biliverdin<br>Biliverdin<br>Biliverdin in human CSF<br>Heme                                                                                                                                    | 33 nM<br>37 nM<br><br><br>conjugates                                                  | 1:1               | TFQ, SPR<br><br>SAXS<br>SAXS, NMR<br>NMR<br>NMR                       | Beuckmann et al., 1999<br><br>Inoue et al., 2009<br>Miyamoto et al., 2009<br>Inui et al., 2014<br>Phillips et al., 2020   |
| <b>Amyloid <math>\beta</math> (A<math>\beta</math>) peptides</b><br>A $\beta$ (1-40), A $\beta$ (1-42)<br>A $\beta$ (1-40), A $\beta$ (25-35)                                                                                                                                    | 18-50 nM                                                                              | 1:1<br>1:1        | SPR<br>NMR, SAXS                                                      | Kanekiyo et al., 2007<br>Kannaian et al., 2019                                                                            |
| <b>Lipids and fatty acids</b><br>GM1 and GM2 gangliosides<br>Oleic acid & palmitoleic acid<br>Oleic acid<br>Palmitoleic acid<br>Synthetic FABP inhibitor SBFI-26                                                                                                                 | 65-210 nM<br><br>Ki=1.8 $\mu$ M<br>Ki=3.7 $\mu$ M<br>Ki=3.0 $\mu$ M                   | 1:(1+1)           | SPR<br>X-ray crystallography<br>Displacement of<br>DAUDA binding, TFQ | Mohri et al., 2006a<br>Zhou et al., 2010<br>Elmes et al., 2018                                                            |
| <b>Poorly water-soluble drugs</b><br>Diazepam, NBQX<br>Telmisartan<br>Anti-cancer drug SN-38<br>Telmisartan and imatinib<br>Cannabinoid receptor 2 antagonists<br>AM630<br>WIN55212-2                                                                                            | <br><br>60 $\mu$ M<br>0.4-40 $\mu$ M<br><br>N.D.<br>N.D.                              | 1:3<br>1:3<br>1:2 | ITC<br>ITC<br>ITC<br><br>Docking simulation                           | Fukuhara et al., 2012<br>Mizoguchi et al., 2015<br>Nakatsuji et al., 2015<br>Teraoka et al., 2017<br><br>Yeh et al., 2019 |
| <b>Cannabinoid metabolites, synthetic cannabinoids</b><br>Cannabidiol<br>$\Delta^9$ -tetrahydrocannabinol (THC)<br>11-hydroxy- $\Delta^9$ -tetrahydrocannabinol (11-OH-THC)<br>11-nor-9-carboxy- $\Delta^9$ -tetrahydrocannabinol (THC-COOH)<br>Synthetic FABP inhibitor SBFI-26 | Ki=78 $\mu$ M<br>Ki=175 $\mu$ M<br>Ki=61 $\mu$ M<br><br>Ki=7.8 $\mu$ M<br>3.0 $\mu$ M |                   | Displacement of<br>DAUDA binding, TFQ                                 | Elmes et al., 2018                                                                                                        |
| <b>Anticholinergic drugs</b><br>Chlorpheniramine<br>Trazodone                                                                                                                                                                                                                    | 4.3 - 5.7 $\mu$ M<br>5.3 - 6.5 $\mu$ M                                                | 1:3<br>1:3.4      | TFQ, ITC, NMR                                                         | Low et al., 2020                                                                                                          |

|                                                                                                             |                                                                                          |                          |          |                        |
|-------------------------------------------------------------------------------------------------------------|------------------------------------------------------------------------------------------|--------------------------|----------|------------------------|
| <b>Nicotinamide coenzymes</b><br>NADPH, NADP+, and NADH                                                     | 47-370 $\mu$ M                                                                           | 1:1                      | ITC, NMR | Qin et al., 2015       |
| <b>Substrate analog and product</b><br>U-46619<br>PGD <sub>2</sub><br>PGE <sub>2</sub><br>PGF <sub>2a</sub> | 0.53 and 7.91 $\mu$ M<br>0.31 and 44.3 $\mu$ M<br>25.8 $\mu$ M<br>2.52 and 137.4 $\mu$ M | 1:2<br>1:2<br>1:1<br>1:2 | ITC, NMR | Shimamoto et al., 2021 |

\*TFQ: tryptophan fluorescence quenching, SAXS: Small angle X-ray scattering, SPR: Surface plasmon resonance,

ITC: Isothermal titration calorimetry, DAUDA: 11-(dansylamino)undecanoic acid.
