# Supplementary material for: Biochemical and Structural Characteristics, Gene Regulation, Physiological, Pathological and Clinical Features of Lipocalin-Type Prostaglandin D2 Synthase as a Multifunctional Lipocalin
Source: PubMed Central journal article supplement (PMC8569824; doi:10.3389/fphys.2021.718002), 2021-10-22
Supplement: Table_5.pdf [file Table_5.pdf]

**Table 5. Cell culture studies of L-PGDS**

| Cells and tissues                                                                            | Species | Data                                                                                                                                                                                                                            | Ref                           |
|----------------------------------------------------------------------------------------------|---------|---------------------------------------------------------------------------------------------------------------------------------------------------------------------------------------------------------------------------------|-------------------------------|
| <b>1) L-PGDS studies in cells of the central nervous system (CNS)</b>                        |         |                                                                                                                                                                                                                                 |                               |
| Neuronal GT1-7 cells                                                                         | Mouse   | Dexamethasone induces L-PGDS gene transcription. TPA inhibits its induction.                                                                                                                                                    | García-Fernández et al., 2000 |
| Primary cultured leptomeningeal cells                                                        | Rat     | L-PGDS gene expression is down regulation by the Notch-Hes signal through the E-box and upregulated by IL-1 $\beta$ through the NF- $\kappa$ B pathway.                                                                         | Fujimori et al., 2003         |
|                                                                                              |         | Contact with astrocytes increases L-PGDS expression.                                                                                                                                                                            | Fujimori et al., 2007b        |
| Brain-derived TE671 cells                                                                    | Human   | L-PGDS expression is repressed by the Notch-Hes signal and maintained by AP-2 $\beta$ function. Protein kinase C activates L-PGDS expression through derepression of Notch-HES signal and enhancement of AP-2 $\beta$ function. | Fujimori et al., 2005         |
|                                                                                              |         | L-PGDS gene expression is activated by USF-1 through the atypical E box within intron 4 and cooperatively by AP-2 $\beta$ in the promoter.                                                                                      | Fujimori and Urade. 2007      |
|                                                                                              |         | L-PGDS gene expression is activated by USF-1 through the atypical E box within intron 4 through activation of p38MAPK by serum starvation                                                                                       | Fujimori et al., 2008         |
| Neuroblastoma SH-SY5Y                                                                        | Human   | L-PGDS protects the neuronal cell death induced by oxidative stress.                                                                                                                                                            | Fukuhara et al., 2012         |
|                                                                                              |         | L-PGDS prevents the paraquat-induced apoptosis via the NF- $\kappa$ B element in the proximal promotor region of the gene.                                                                                                      | Fujimori et al., 2012         |
| U251 glioma cell line                                                                        | Human   | Estradiol evokes an inverted U response of L-PGDS promoter activity in the cells expressing estrogen receptor (ER) $\alpha$ , but not $\beta$ .                                                                                 | Devizde et al., 2010          |
| Primary cultured astrocytes, microglia, cerebral endothelial cells, NIH3T3 fibroblast cells. | Mouse   | L-PGDS activates glial cell migration and morphology as PGD <sub>2</sub> -independent effects.                                                                                                                                  | Lee et al., 2012              |
| <b>2) L-PGDS studies in vascular cells</b>                                                   |         |                                                                                                                                                                                                                                 |                               |
| Vascular endothelial cells (ECs)                                                             | Human   | Fluid shear stress upregulates L-PGDS expression.                                                                                                                                                                               | Taba et al., 2000             |
|                                                                                              |         | Fluid shear stress induces L-PGDS gene expression by transcriptional activation through the AP-1 site.                                                                                                                          | Miyagi et al., 2005           |
|                                                                                              |         | Fluid shear stress increases L-PGDS expression in ECs of the CC genotype of the T786C single nucleotide polymorphism of the NO synthase 3.                                                                                      | Urban et al., 2019            |
| Vascular smooth muscle cells from the aortic media                                           | Rats    | L-PGDS induces apoptosis of these cells. The apoptotic activity is reduced by site-directed mutagenesis in a glycosylation site Asn51, a protein kinase C phosphorylation site Ser106 and the enzyme active site Cys65.         | Ragolia et al., 2007          |
| <b>3) L-PGDS studies in adipocytes</b>                                                       |         |                                                                                                                                                                                                                                 |                               |
| Adipocytic 3T3-L1 cells                                                                      | Mouse   | L-PGDS is involved in adipocyte differentiation. L-PGDS gene expression is activated by LRH-1 in preadipocytes and by SREBP-1c in adipocytes.                                                                                   | Fujimori et al., 2007a        |
|                                                                                              |         | Gene knockdown of L-PGDS by antisense L-PGDS in preadipocytes stimulates fat storage during the maturation stage.                                                                                                               | Chowdhury et al., 2011        |
|                                                                                              |         | $\Delta^{12}$ -PGJ <sub>2</sub> , a dehydrated product of PGD <sub>2</sub> , activates adipogenesis through PPAR $\gamma$ -dependent and independent pathways                                                                   | Fujimori et al., 2012         |
|                                                                                              |         | CRTH2 receptors are expressed in adipocytes and suppress the lipolysis by repression of the cAMP-protein kinase A-hormone sensitive lipase axis.                                                                                | Wakai et al., 2017            |

|                                                                    |       |                                                                                                                                                                                                                 |                        |
|--------------------------------------------------------------------|-------|-----------------------------------------------------------------------------------------------------------------------------------------------------------------------------------------------------------------|------------------------|
|                                                                    |       | Glucocorticoid induces L-PGDS and leptin expression.                                                                                                                                                            | Yeh et al., 2019       |
| Mesenchymal stroma cells                                           | Human | siRNA-mediated downregulation of L-PGDS reduces adipocyte differentiation.                                                                                                                                      | Lange et al., 2012     |
| <b>4) L-PGDS studies in skeletal muscle cells</b>                  |       |                                                                                                                                                                                                                 |                        |
| Skeletal muscle cell line L6                                       | Rat   | L-PGDS stimulates glucose transport.                                                                                                                                                                            | Ragolia et al., 2008   |
| <b>5) L-PGDS studies in cells of the peripheral nervous system</b> |       |                                                                                                                                                                                                                 |                        |
| Primary culture of the dorsal root ganglion (DRG) neurons          | Rat   | L-PGDS is upregulated in DRG neurons by neuregulin 1(NRG) type III, a member of the NRG family of growth factors, and involved in myelination of Schwann cells by stimulation of CRTH2 receptors.               | Trimarco et al., 2014  |
| Primary culture of the enteric nervous system                      | Rat   | L-PGDS is expressed in neurons and glia of the enteric cells and upregulated by LPS stimulation.                                                                                                                | Le Loupp et al., 2015  |
| <b>6) L-PGDS studies in macrophages</b>                            |       |                                                                                                                                                                                                                 |                        |
| Macrophage cell line RAW 264.7 cells                               | Mouse | L-PGDS expression is upregulated by LPS or Pseudomonas, and regulated positively by AP-1 but negatively by p53.                                                                                                 | Joo et al., 2007       |
|                                                                    |       | L-PGDS is induced by LPS through a transcription factor PU.1 activation by casein kinase II or NF- $\kappa$ B-inducing kinase, cooperated with MAPK-activated cJun.                                             | Joo et al., 2009       |
| <b>7) L-PGDS studies in chondrocytes</b>                           |       |                                                                                                                                                                                                                 |                        |
| Cultured osteoarthritic chondrocytes                               | Human | L-PGDS is upregulated by IL-1 $\beta$ through the JNK and p38 MAPK and NF- $\kappa$ B signaling pathway                                                                                                         | Zayed et al., 2008     |
| <b>8) L-PGDS studies in mast cell maturation</b>                   |       |                                                                                                                                                                                                                 |                        |
| Bone marrow-derived mast cells (BMMC)                              | Mouse | BMMC from KO mice of L-PGDS, DP, phospholipase A2 group 3 exhibit impaired maturation and anaphylaxis.                                                                                                          | Taketomi et al., 2013  |
| <b>9) L-PGDS studies in cells of the skin</b>                      |       |                                                                                                                                                                                                                 |                        |
| Melanocytes, B16 melanoma cells                                    | Mouse | L-PGDS is regulated by microphthalmia-associated transcription factor (MITF) responsible for melanocyte differentiation.                                                                                        | Takeda et al., 2006    |
| Keratinocytes from neonatal foreskin                               | Human | L-PGDS inhibitor AT-56 counteracts the antimycotic-induced suppression of thymic stromal lymphopoietin production and the NF- $\kappa$ B activity.                                                              | Hau et al., 2013       |
| <b>10) L-PGDS studies in cancer cells</b>                          |       |                                                                                                                                                                                                                 |                        |
| Gastric cancer cell lines MKN45, HGC-27, MGC80-3 and 293 T cells   | Human | L-PGDS and CRTH2 expression is suppressed by overexpression of Yes-associated protein 1 (YAP) in these cells. Overexpression of L-PGDS or CRTH2 decreases proliferation and self-renewal of these cells by YAP. | Bie et al., 2020       |
| Cervical carcinoma cells                                           | Human | L-PGDS knockdown by siRNA prevents chemotherapeutics-induced apoptosis.                                                                                                                                         | Eichele et al., 2008   |
| <b>11) L-PGDS studies in cells of the prostate gland</b>           |       |                                                                                                                                                                                                                 |                        |
| Prostate epithelial cells and fibroblasts                          | Human | L-PGDS and Cox-2 are induced in both cell types by low dose of bisphenolA. Inhibitors of L-PGDS (AT56) or Cox-2 (NS398) induce apoptosis of both cell types.                                                    | Wu et al., 2020        |
| <b>12) L-PGDS studies in sperm and oocytes</b>                     |       |                                                                                                                                                                                                                 |                        |
| Sperm and/or oocytes                                               | Cow   | Pretreatment of sperm and/or oocytes with antibody against L-PGDS inhibits in vitro fertilization and increases sperm-oocyte binding                                                                            | Gonçaves et al., 2008a |

|                                                                                       |         |                                                                                                                                                                                                                                                                                                                                         |                         |
|---------------------------------------------------------------------------------------|---------|-----------------------------------------------------------------------------------------------------------------------------------------------------------------------------------------------------------------------------------------------------------------------------------------------------------------------------------------|-------------------------|
| Oocytes                                                                               |         | Antibody against L-PGDS reacts with oocytes incubated with oviduct fluid and inhibits sperm binding, fertilization and embryonic development.                                                                                                                                                                                           | Gonçalves et al., 2008b |
| <b>13) Amphibian ortholog of L-PGDS in Xenopus cells and embryo</b>                   |         |                                                                                                                                                                                                                                                                                                                                         |                         |
| Xenopus A6 cells                                                                      | Xenopus | Expression and characterization of amphibian L-PGDS                                                                                                                                                                                                                                                                                     | Irikura et al., 2007    |
| Embryo                                                                                |         | Xenopus L-PGDS participates in the establishment of the pre-placodal region of embryo as a retinoic acid transporter.                                                                                                                                                                                                                   | Jaurena et al., 2015    |
| <b>14) Intracellular interaction of L-PGDS and DP receptors in HEK and HeLa cells</b> |         |                                                                                                                                                                                                                                                                                                                                         |                         |
| HEK cells, HeLa cells                                                                 | Human   | L-PGDS interacts intracellularly with DP in an agonist-independent manner and promotes cell surface expression of DP. DP export to the cell surface is dependent on DP-Hsp90 complex formation and the interaction between LPGDS and the C-terminal MEEVD residues of Hsp90. PGD2 synthesis by LPGDS is promoted by coexpression of DP. | Binda et al., 2014      |
| HeLa cells                                                                            |         | L-PGDS regulates the trafficking of DP by interacting with GTPase Rab4.                                                                                                                                                                                                                                                                 | Binda et al., 2019      |
