# Supplementary material for: Biochemical and Structural Characteristics, Gene Regulation, Physiological, Pathological and Clinical Features of Lipocalin-Type Prostaglandin D2 Synthase as a Multifunctional Lipocalin
Source: PubMed Central journal article supplement (PMC8569824; doi:10.3389/fphys.2021.718002), 2021-10-22
Supplement: Table_6.pdf [file Table_6.pdf]

**Table 6. Animal experiments used for the study of L-PGDS**

| Animals                                                                       | Phenotypes                                                                                                                                                                                                         | Ref                             |
|-------------------------------------------------------------------------------|--------------------------------------------------------------------------------------------------------------------------------------------------------------------------------------------------------------------|---------------------------------|
| <b>1) Central nervous system</b>                                              |                                                                                                                                                                                                                    |                                 |
| <b>1-i) Pain response</b>                                                     |                                                                                                                                                                                                                    |                                 |
| L-PGDS-KO mice                                                                | Lack of PGE <sub>2</sub> or bicuculline-induced allodynia (touch-evoked pain)                                                                                                                                      | Eguchi et al., 1999             |
| Rats with lumbar disc herniation (LDH)                                        | Overexpression and knockdown of L-PGDS, respectively, attenuates and worsens the herniation-triggered thermomechanical allodynia and degradation of DRG.                                                           | Xu et al., 2021                 |
| <b>1-ii) Sleep regulation</b>                                                 |                                                                                                                                                                                                                    |                                 |
| Human L-PGDS-overexpressing TG mice                                           | Sleep attack after tail cutting.                                                                                                                                                                                   | Pinzar et al., 2000             |
| L-PGDS or DP KO mice                                                          | Lack of non-rapid eye movement sleep rebound after sleep deprivation                                                                                                                                               | Hayaishi et al., 2004           |
| L-PGDS, H-PGDS, L/H-PGDS double, DP or CRTH2 KO mice                          | Lack of SeCl <sub>4</sub> -induced insomnia.                                                                                                                                                                       | Qu et al., 2006                 |
|                                                                               | L-PGDS, L/H-PGDS double or DP KO mice do not induce postictal sleep after seizure induced by pentylentetrazole.                                                                                                    | Kaushik et al., 2014            |
| Leptomeninges-, oligo-dendrocytes-, or choroid plexus-specific L-PGDS KO mice | SeCl <sub>4</sub> -induced insomnia is lacked in leptomeninges-specific L-PGDS KO mice but found in oligodendrocytes- or choroid plexus-specific KO mice.                                                          | Cherasse et al., 2018           |
| Estradiol-administered mice                                                   | L-PGDS expression is increased in the arcuate and ventromedial nucleus of the medial basal hypothalamus, a center of neuroendocrine secretions, and reduced in the ventrolateral preoptic area, a sleep center.    | Mong et al., 2003               |
| Ovariectomized female mice                                                    | Estrogen reduces L-PGDS expression in a region-dependent manner in the preoptic area, a sleep center. Estradiol benzoate induces high motor activity and reduces LPGDS mRNA in sleep-active areas.                 | Ribeiro et al., 2009            |
| <b>1-iii) Neuronal and glial protection</b>                                   |                                                                                                                                                                                                                    |                                 |
| L-PGDS and galactosylceramidase (GALC) double KO mice                         | L-PGDS is progressively upregulated in oligodendrocytes of GALC-deficient twitcher mice. In L-PGDS and GALC double KO mice, many neurons and oligodendrocytes show apoptosis.                                      | Taniike et al., 2002            |
| Lysosomal storage disorders mouse models                                      | L-PGDS mRNA and immunoreactivity are upregulated in oligodendrocytes in these lysosomal storage disorders mouse models of Tay–Sachs disease, Sandhoff disease, GM1gangliosidosis and Niemann–Pick type C1 disease. | Mohri et al., 2006a             |
| Neonatal mice                                                                 | L-PGDS acts as an early stress protein to protect against neuronal death in the hypoxic ischemic encephalopathy.                                                                                                   | Taniguchi et al., 2007          |
| L-PGDS-KO mice                                                                | L-PGDS KO mice exhibit greater infarct volume and brain edema after cerebral ischemia than wild type mice.                                                                                                         | Saleem et al., 2009             |
| 10-day -old rats                                                              | Intracerebroventricular (icv) administration of dexamethasone upregulates L-PGDS expression in the brain and protects neonatal hypoxic-ischemic brain injury.                                                      | Gonzalez-Rodriguez et al., 2014 |
| Adult male Wistar rats                                                        | Chronic intermittent hypoxia (12h/day for 6 weeks) increases PGD <sub>2</sub> content and L-PGDS protein and mRNA from the 2nd week.                                                                               | Shan et al., 2017               |
| COX-2 and APP/PS1 crossed mice                                                | L-PGDS expression is more enhanced in COX-2-overexpressing APP/PS1 mice than APP/PS-1 mice.                                                                                                                        | Guan et al., 2019               |
| <b>1-iv) Amyloid β (Aβ) fibril prevention</b>                                 |                                                                                                                                                                                                                    |                                 |
| L-PGDS-KO mice                                                                | L-PGDS KO mice increase deposition of Aβ(1-42) in the brain.                                                                                                                                                       | Kanekiyo et al., 2007           |
| Human L-PGDS-overexpressing TG mice                                           | L-PGDS TG mice decrease deposition of Aβ(1-42) in the brain.                                                                                                                                                       |                                 |
| <b>1-v) Depression-related behavior</b>                                       |                                                                                                                                                                                                                    |                                 |

|                                                                   |                                                                                                                                                                                                                                                                                              |                        |
|-------------------------------------------------------------------|----------------------------------------------------------------------------------------------------------------------------------------------------------------------------------------------------------------------------------------------------------------------------------------------|------------------------|
| CRTH2-KO mice                                                     | CRTH2 KO or CRTH2 antagonist ramatoroban rescues the depression behavior induced by chronic treatment of corticosterone, lipopolysaccharide and tumor.                                                                                                                                       | Onaka et al., 2015     |
| <b>1-vi) Circadian rhythm of behavior</b>                         |                                                                                                                                                                                                                                                                                              |                        |
| L-PGDS-KO mice                                                    | L-PGDS KO mice and CRTH2 antagonist impair light-induced phase advance.                                                                                                                                                                                                                      | Kawaguchi et al., 2020 |
| <b>1-vii) Food intake</b>                                         |                                                                                                                                                                                                                                                                                              |                        |
| Male ddY mice                                                     | L-PGDS is upregulated in hypothalamus after fasting. I.c.v. administration of PGD2 or DP agonist stimulates food intake. The orexigenic effect is blocked by DP and neuropeptide Y receptor antagonist.                                                                                      | Ohinata et al., 2008   |
| L-PGDS-KO mice, DP KO mice, L-PGDS <sup>fllox</sup> /Nes-Cre mice | Orally administered rubiscolin-6, a $\delta$ opioid peptide, stimulates food intake in L-PGDS <sup>fllox</sup> /Nes-Cre mice.                                                                                                                                                                | Kaneko et al., 2012    |
| L-PGDS-KO mice                                                    | Activation of central $\delta$ -opioid receptor stimulates normal diet intake mediated by L-PGDS but suppresses high-fat diet intake in an L-PGDS-independent manner.                                                                                                                        | Kaneko et al., 2014    |
| <b>2) Myelination of peripheral nervous system</b>                |                                                                                                                                                                                                                                                                                              |                        |
| L-PGDS KO mice                                                    | L-PGDS KO mice have hypomyelinated peripheral nervous system.                                                                                                                                                                                                                                | Trimarco et al., 2014  |
| L-PGDS KO mice                                                    | In injured peripheral nerves, L-PGDS controls macrophages accumulation in injured nerves, allowing myelin debris clearance and favoring axonal regeneration and remyelination.                                                                                                               | Forese et al., 2020    |
| <b>3) Lung inflammation</b>                                       |                                                                                                                                                                                                                                                                                              |                        |
| Human L-PGDS-overexpressing TG mice                               | L-PGDS TG mice show pronounced eosinophilic lung inflammation and Th2 cytokine release in ovalbumin-induced asthma model.                                                                                                                                                                    | Fujitani et al., 2002  |
| Human L-PGDS-overexpressing TG mice                               | L-PGDS TG mice show improved clearance of Pseudomonas from the lung.                                                                                                                                                                                                                         | Joo et al., 2007       |
| L-PGDS-KO mice                                                    | L-PGDS KO mice show impaired clearance of Pseudomonas from the lung.                                                                                                                                                                                                                         |                        |
| H-PGDS KO mice                                                    | L-PGDS inhibitor AT56 suppresses accumulation of eosinophils and monocytes in the broncho-alveolar lavage fluid of antigen-induced inflammation.                                                                                                                                             | Irikura et al., 2009   |
| L-PGDS-KO mice                                                    | Lung edema is enhanced in L-PGDS KO mice in a HCl-induced acute lung injury model by a decrease in DP-mediated barrier function of endothelial cells.                                                                                                                                        | Horikami et al., 2019  |
| <b>4) Cardiovascular function</b>                                 |                                                                                                                                                                                                                                                                                              |                        |
| Estrogen-administered mice                                        | L-PGDS is an estrogen receptor beta-regulated gene in the heart.                                                                                                                                                                                                                             | Otsuki et al., 2003    |
| Heme oxygenase (HO) 2 KO mice                                     | L-PGDS is induced in the heart by hypoxemia in wild-type mice and more significantly in HO-2 KO mice.                                                                                                                                                                                        | Han et al., 2009       |
| L-PGDS-KO mice                                                    | L-PGDS KO mice exhibit reduction of dexamethasone-induced cardioprotection effects against ischemia/reperfusion injury.                                                                                                                                                                      | Tokudome et al., 2009  |
| FP KO mice, erythroid-derived 2-like 2 (Nrf2) KO mice             | L-PGDS-mediated, dexamethasone-induced cardioprotection effects are not found in Nrf2-KO or FP KO mice.                                                                                                                                                                                      | Katsumata et al., 2014 |
| Isolated perfused hypotoxic beating rat atria                     | Hypoxia increases hypoxia-induced factor 1 $\alpha$ (HIF-1 $\alpha$ ), stimulates ANP secretion and upregulates L-PGDS. HIF-1 $\alpha$ antagonist attenuates hypoxia-induced ANP secretion and down regulates L-PGDS level. L-PGDS inhibitor AT-56 attenuated hypoxia-induced ANP secretion. | Li et al., 2018        |
|                                                                   | Acute hypoxia increases expression of L-PGDS and Cox-2 through endothelin (ET)-1 secretion and activation of ET <sub>A</sub> and ET <sub>B</sub> receptors.                                                                                                                                  | Li et al., 2019        |
| <b>5) Obesity and adipocyte differentiation</b>                   |                                                                                                                                                                                                                                                                                              |                        |

|                                                                                                                             |                                                                                                                                                                                                                                                                                          |                       |
|-----------------------------------------------------------------------------------------------------------------------------|------------------------------------------------------------------------------------------------------------------------------------------------------------------------------------------------------------------------------------------------------------------------------------------|-----------------------|
| L-PGDS-KO mice                                                                                                              | L-PGDS KO mice exhibit glucose-in-tolerant and insulin-resistant at an accelerated rate, and larger adipocytes than wild-type mice. L-PGDS KO mice develop nephropathy and an aortic thickening reminiscent to the early stage of atherosclerosis when fed a diabetogenic high fat diet. | Ragolia et al., 2005  |
|                                                                                                                             | L-PGDS KO mice exhibit reduced sensitivity to insulin-stimulated glucose transport.                                                                                                                                                                                                      | Ragolia et al., 2008  |
|                                                                                                                             | L-PGDS KO mice exhibit more severe atherosclerotic plaque in the aorta, macrophage cellularity and expression of pro-inflammatory responses than wild-type mice.                                                                                                                         | Tanaka et al., 2009   |
|                                                                                                                             | L-PGDS KO mice show early elevations in hypothalamic-pituitary-adrenal activity, plasma corticosterone and ACTH concentrations.                                                                                                                                                          | Evans et al., 2013    |
| L-PGDS KO mice, L-PGDS knock-in (KI) mice                                                                                   | L-PGDS KO mice decrease beneficial metabolic effects after vertical sleeve gastrectomy.                                                                                                                                                                                                  | Kumar et al., 2016    |
| L-PGDS-KO mice, H-PGDS KO mice                                                                                              | L-PGDS KO mice show hypertension and acceleration of thrombogenesis.                                                                                                                                                                                                                     | Song et al., 2018     |
| L-PGDS <sup>fllox</sup> -fatty acid binding protein 4 (aP2)-Cre mice; /L-PGD <sup>fllox</sup> adiponectin (AdipoQ)-Cre mice | High fat diet-induced body weight gain is reduced only in aP2-Cre/L-PGDS <sup>fllox</sup> mice with the premature adipocyte-selective deletion but unchanged in AdipoQ-Cre/L-PGDS <sup>fllox</sup> mice with the mature adipocyte-selective deletion.                                    | Fujimori et al., 2019 |
| PPAR $\gamma$ -KO mice, PPAR $\gamma$ -LPGDS double KO mice                                                                 | LPGDS is upregulated in brown and white adipose tissues of PPAR $\gamma$ -KO mice. PPAR $\gamma$ -LPGDS double KO mice reduce the expression of thermogenic genes. LPGDS and PPAR $\gamma$ coordinate to regulate carbohydrate and lipid metabolism.                                     | Virtue et al., 2012b  |
| LPGDS KO mice under cold acclimated conditions                                                                              | LPGDS expression in brown adipose tissue (BAT) is correlated with the BAT activity of thermogenesis. Under cold-acclimated conditions, LPGDS KO mice elevate reliance on carbohydrates.                                                                                                  | Virtue et al., 2012a  |
| Wild-type C57BL/6 and ob/ob mice                                                                                            | LPGDS is down regulated in white adipose tissue of ob/ob mice, whereas HPGDS is upregulated in WAT of ob/pb mice.                                                                                                                                                                        | Virtue et al., 2015   |
| <b>6) Bone and cartilage metabolism</b>                                                                                     |                                                                                                                                                                                                                                                                                          |                       |
| DBA/1J mice                                                                                                                 | L-PGDS H-PGDS, DP, CRTH2 are upregulated in articular tissues during the arthritic process. The injection of PGD <sub>2</sub> or DP agonist into paw attenuates the incidence of collagen-induced arthritis, the inflammatory response and joint damage.                                 | Maicas et al., 2012   |
| Hartley guinea pig, dog                                                                                                     | L-PGDS increases over the course of osteoarthritis. L-PGDS levels correlated positively with the histological score of osteoarthritis.                                                                                                                                                   | Nebbaki et al., 2013  |
| L-PGDS KO mice                                                                                                              | L-PGDS KO mice exacerbate experimental osteoarthritis.                                                                                                                                                                                                                                   | Najar et al., 2020    |
|                                                                                                                             | L-PGDS KO mice exhibit promoted cartilage degradation, enhanced subchondral bone changes without effect on its angiogenesis, increased mechanical sensitivity and reduced spontaneous locomotor activity during aging.                                                                   | Ouhaddi et al., 2020  |
| <b>7) Keratinocytes and hair follicle neogenesis</b>                                                                        |                                                                                                                                                                                                                                                                                          |                       |
| C57Bl/6J, FVB/N and Mixed (C57Bl/6J $\times$ FVB/N $\times$ SJL) mice, CRTH2-KO mice                                        | L-PGDS and PGD <sub>2</sub> levels of the skin among these strains of mice are negatively correlated with wound-induced hair follicle neogenesis. CRTH2-KO mice, but not DP KO mice, increase the hair follicle regeneration. L-PGDS is expressed in keratinocytes in the skin.          | Nelson et al., 2013   |
| <b>8) Fibroblastic L-PGDS for mast cell maturation and anaphylaxis</b>                                                      |                                                                                                                                                                                                                                                                                          |                       |
| L-PGDS KO mice, DP KO mice, phospholipase A2 group 3 (PLA2G3) KO mice, mast cell-deficient mice                             | PLA2G3 secreted from mast cells is coupled with fibroblastic L-PGDS to provide PGD <sub>2</sub> , which facilitates mast cell maturation via DP.                                                                                                                                         | Taketomi et al., 2013 |
| <b>9) Colon</b>                                                                                                             |                                                                                                                                                                                                                                                                                          |                       |
| L-PGDS-KO mice                                                                                                              | L-PGDS KO mice improve dextran sodium sulfate-induced colitis.                                                                                                                                                                                                                           | Hokari et al., 2011   |

| <b>10) Adenoma growth in intestine and colon</b>                                            |                                                                                                                                                                                |                         |
|---------------------------------------------------------------------------------------------|--------------------------------------------------------------------------------------------------------------------------------------------------------------------------------|-------------------------|
| Apc <sup>Min/+</sup> mice mated with human H- or L-PGDS-TG and H-PGDS, L-PGDS or DP KO-mice | Overexpression of H-PGDS or L-PGDS in Apc <sup>(Min/+)</sup> mice have fewer adenoma and HPGDS or DP KO in APC <sup>(Min/+)</sup> mice, more adenoma.                          | Tippin et al., 2014     |
| <b>11) Melanoma growth</b>                                                                  |                                                                                                                                                                                |                         |
| L-PGDS-KO mice, endothelial cells (EC)-specific L-PGDS KO mice                              | Melanoma growth is accelerated in L-PGDS KO mice and EC-selective L-PGDS KO mice.                                                                                              | Omori et al., 2018      |
| <b>12) Renal function</b>                                                                   |                                                                                                                                                                                |                         |
| Adriamycin-induced nephropathy of mice                                                      | Urinary L-PGDS excretion increases before albuminuria.                                                                                                                         | Tsuchida et al., 2004   |
| Otsuka Long-Evans Tokushima Fatty (OLETF) rats                                              | Urinary secretion of L-PGDS is higher in OLETF rats than non-diabetic Long-Evans Tokushima Otsuka (LETO) rats, in an age-dependent manner.                                     | Ogawa et al., 2006      |
| Monkey                                                                                      | L-PGDS is produced de novo in the cells of Henle's loop and the glomeruli of the kidney and N-terminal truncated in the lysosomes of tubular cells.                            | Nagata et al., 2009     |
| L-PGDS-KO mice, CRTH2-KO mice, IL4 KO mice, IL13 KO mice                                    | Unilateral ureteral obstruction induces renal fibrosis, which is exacerbated by the LPGDS/CRTH2/Th 2 cytokines pathway.                                                        | Ito et al., 2012        |
| <b>13) Preterm birth</b>                                                                    |                                                                                                                                                                                |                         |
| L-PGDS-KO mice, Human L-PGDS overexpressing TG mice                                         | Incidence of preterm birth by LPS administration is decreased in KO mice and increased in TG mice. DP and CRTH2 antagonists increase the number of viable pups.                | Kumar et al., 2015      |
| <b>14) Adenomyosis</b>                                                                      |                                                                                                                                                                                |                         |
| L/H-PGDS double KO mice                                                                     | L/H-PGDS double KO mice develop adenomyotic lesions at 6-month-old and the disease severity increases with age.                                                                | Philibert et al., 2021  |
| <b>15) Testis and epididymis</b>                                                            |                                                                                                                                                                                |                         |
| Bull                                                                                        | L-PGDS is expressed in testis, epididymis and ejaculated sperm.                                                                                                                | Gerena et al., 2000     |
| Rats                                                                                        | L-PGDS expression is decreased after castration or ethylene dimethane sulfonate treatment and recovered by testosterone.                                                       | Zhu et al., 2004        |
| L-PGDS-KO mice                                                                              | Heterozygous and homozygous L-PGDS KO mice present unilateral cryptorchidism affecting the second phase of testicular descent in 16% and 24% of case, respectively.            | Philibert et al., 2013  |
| <b>16) Prostate gland</b>                                                                   |                                                                                                                                                                                |                         |
| Male SD rats, bisphenol A-induced prostatic hyperplasia                                     | Low dose bisphenol A upregulates L-PGDS expression in ventral prostate.                                                                                                        | Wu et al., 2020         |
| <b>17) Male germ cell differentiation in the foetal testis</b>                              |                                                                                                                                                                                |                         |
| MF1 mice                                                                                    | L-PGDS is identified as the male-enriched transcript in mouse embryonic gonads.                                                                                                | Adams and McLaren, 2002 |
| Swiss mice                                                                                  | PGD <sub>2</sub> induces nuclear import of the sex-determining factor Sox9 via its cAMP-PKA phosphorylation mediated by DP receptors.                                          | Malki et al., 2005      |
| Swiss Quackenbush outbred mice                                                              | SOX9 binds to and activates the L-PGDS promoter during testis development.                                                                                                     | Wilhelm et al., 2007    |
| L-PGDS KO mice, Sox9 KO mice, Fgf KO mice                                                   | L-PGDS expression is down-regulated in Sox9 KO gonads, but unchanged by Fgf KO gonads. Both Fgf9 and PGD <sub>2</sub> signaling cooperate to upregulate Sox9 in Sertoli cells. | Moniot et al., 2009     |
| L-PGDS KO mice, H-PGDS KO mice                                                              | An initial H-PGDS-mediated PGD <sub>2</sub> signal participates in the Sox9 nuclear translocation necessary for the process of Sertoli cell differentiation.                   | Moniot et al., 2011     |

|                                                            |                                                                                                                                                                                                                                                                                                                                                                                 |                           |
|------------------------------------------------------------|---------------------------------------------------------------------------------------------------------------------------------------------------------------------------------------------------------------------------------------------------------------------------------------------------------------------------------------------------------------------------------|---------------------------|
| L-PGDS, H-PGDS, L/H-PGDS double KO mice, DP, CRTH2 KO mice | The double KO mice and CRTH2 KO mice exhibit increased proliferation rates of germ cells without being mitotically arrested at the late phase of embryonic stages. Both somatic- and germ cell-produced PGD <sub>2</sub> , acting in both a paracrine and an autocrine manner, plays a role in the regulation of male foetal germ cell differentiation through CRTH2 receptors. | Moniot et al., 2014       |
| <b>18) Pharmacokinetics of L-PGDS</b>                      |                                                                                                                                                                                                                                                                                                                                                                                 |                           |
| Dogs                                                       | After an i.v. bolus injection, the serum concentration L-PGDS decreases with t <sub>1/2</sub> of 0.77 h, which is shorter than that of other protein with the same Mr. About 10% of LPGDS is secreted to the urine. After the intrathecal injection, about one third of the injected L-PGDS is excreted to the blood.                                                           | Li et al., 2008           |
| <b>19) Functionalization of nanoparticles by L-PGDS</b>    |                                                                                                                                                                                                                                                                                                                                                                                 |                           |
| C57/BL mice                                                | L-PGDS-conjugated nanoparticles are taken up by neurons and glial cells mediated by an LDLR-mediated mechanism after the administration from tail vein.                                                                                                                                                                                                                         | Portioli et al., 2017     |
| <b>20) Nonmammalian ortholog of L-PGDS in birds</b>        |                                                                                                                                                                                                                                                                                                                                                                                 |                           |
| Chicken, Dorsal root ganglion                              | L-PGDS-immunoreactivity is localized in DRG neurons and H-PGDS, in DRG glia.                                                                                                                                                                                                                                                                                                    | Vesin et al., 1995        |
| Chicken, Brain, heart, gene                                | Chicken L-PGDS is associated with the enzyme activity and the binding activity of thyroxine and all-trans retinoic acid.                                                                                                                                                                                                                                                        | Fujimori et al., 2006     |
| Chicken, Testis                                            | L-PGDS is expressed in a male specific expression mechanism related with SOX9                                                                                                                                                                                                                                                                                                   | Moniot et al., 2008       |
| <b>21) Nonmammalian ortholog of L-PGDS in amphibian</b>    |                                                                                                                                                                                                                                                                                                                                                                                 |                           |
| Xenopus, Cane toad, Japanese tree frog, genes              | Identification of toad L-PGDS with the enzyme activity and the binding activity of thyroid hormones and all-trans retinoic acid.                                                                                                                                                                                                                                                | Irikura et al., 2007      |
| Xenopus, Placode progenitor formation                      | Xenopus L-PGDS participate in the establishment of the pre-placodal region.                                                                                                                                                                                                                                                                                                     | Jaurena et al., 2015      |
| <b>22) Nonmammalian ortholog of L-PGDS in fish</b>         |                                                                                                                                                                                                                                                                                                                                                                                 |                           |
| Zebrafish, Gene                                            | Identification of Zebrafish L-PGDS without the enzyme activity yet with the binding activity of thyroxine and all-trans retinoic acid                                                                                                                                                                                                                                           | Fujimori et al., 2006     |
| Catfish, Seminal vesicle, testis                           | L-PGDS expression in seminal vesicle is decreased by L-thyroxin overdose and increased by depletion of thyroid hormone. Treatment of catfish with human chorionic gonadotropin and estradiol reduces the L-PGDS expression                                                                                                                                                      | Sreenivasulu et al., 2013 |
